# Supplementary material for: The WHO safe childbirth checklist after 5 years: future directions for improving outcomes
Source: PubMed Central journal article supplement (PMC8864300; doi:10.1016/s2214-109x(21)00556-8), 2022-02-15
Supplement: mmc1.pdf [file mmc1.pdf]

# THE LANCET

## Global Health

### Supplementary appendix

This appendix formed part of the original submission. We post it as supplied by the authors.

Supplement to: Molina RL, Bobanski L, Dhingra-Kumar N, et al. The WHO safe childbirth checklist after 5 years: future directions for improving outcomes. *Lancet Glob Health* 2022; **10**: e324–25.

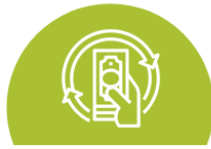

### DONORS

- > Invest in interventions & enabling environments
- > Support data harmonization across funded projects

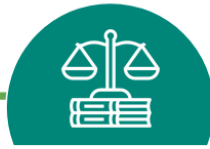

### MINISTRIES OF HEALTH & POLICYMAKERS

- > Identify gaps in enabling environments & create supportive policies with appropriate funding

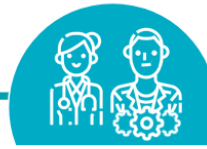

### CLINICIANS & IMPLEMENTERS

- > Continue to take up SCC as part of QI initiatives
- > Share lessons learned about adaptation & implementation through a Community of Practice and link to other existing networks
- > Incorporate new evidence-based guidelines into SCC

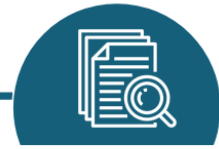

### RESEARCHERS

- > Apply implementation science to understand intervention & implementation successes & challenges
- > Address complexity around childbirth through complementary bundles
- > Harmonize quantitative & qualitative metrics
